# Supplementary material for: NiFe LDH/CuO nanosheet: a sheet-on-sheet strategy to boost the active site density towards oxygen evolution reaction
Source: Royal Society of Chemistry journal article supplement (doi:10.1039/d0ra02985h), 2020-01-01
Supplement: d0ra02985h1.pdf [file d0ra02985h1.pdf]

**NiFe LDH/CuO nanosheets: a sheet on sheet strategy for efficient and durable  
oxygen evolution reaction**

Benfeng Lin,<sup>a,b</sup> Huafeng Le,<sup>a,b</sup> Feng Xu\*<sup>a,b</sup> and Shichun Mu\*<sup>c</sup>

---

<sup>a</sup> *College of Materials Science and Engineering, Fuzhou University, Fuzhou  
350108, P. R. China. E-mail: xufeng.mater@fzu.edu.cn*

<sup>b</sup> *Key Laboratory of Eco-materials Advanced Technology, Fuzhou University,  
350108, P. R. China.*

<sup>c</sup> *State Key Laboratory of Advanced Technology for Materials Synthesis and  
Processing, Wuhan University of Technology, Wuhan 430070, P.R. China. E-  
mail:msc@whut.edu.cn*

## Experimentals

### 1. Chemicals

Sodium hydroxide (NaOH), Ethylenediamine ( $C_2H_8N_2$ ), Hydrazine hydrate ( $N_2H_4 \cdot H_2O$ ), Copper(II) nitrate trihydrate ( $Cu(NO_3)_2 \cdot 3H_2O$ ), Nickel(II) nitrate hexahydrate ( $Ni(NO_3)_2 \cdot 6H_2O$ ), Iron(III) nitrate nonahydrate ( $Fe(NO_3)_3 \cdot 9H_2O$ ), and ethylene glycol were purchased from Sinopharm Chemical Reagent Co., Ltd. and used as-received. Deionized water (DI water, 18.2 M $\Omega$  at 25 °C) was used in all processes.

### 2. Catalysts preparation

#### (1) Synthesis of Cu nanowires

20 mL  $Cu(NO_3)_2 \cdot 3H_2O$  (0.1 M) was slowly added into a three-neck flask containing 200 mL of NaOH (15 M) with agitation, then the solution was kept at 80 °C and agitated for 20 min for the formation of Cu nanowires (CuNWs). After that, the solution was cooled down rapidly to 10 °C in an ice bath, following the filtration and rinsing with plenty of DI water, the CuNWs was freeze dried.

#### (2) Synthesis of CuO nanosheets/Cu nanowires

120 mg of CuNWs and 800 mg of NaOH were dispersed in 200 mL of ethylene glycol in a three-neck flask and stirred for 3 h under  $N_2$  atmosphere. After filtration and rinsing with plenty of DI water, the paste was kept at 200 °C for 3 h.

#### (3) Synthesis of NiFe LDH/CuO nanosheets

The prepared CuO nanosheets/Cu nanowires, 129.0 mg of  $Fe(NO_3)_3 \cdot 6H_2O$ , and 361.9 mg of  $Ni(NO_3)_2 \cdot 6H_2O$  were dispersed in 40 mL of DI water and stirred at 80 °C under  $N_2$ . The Ni:Fe atomic ratio was kept constantly at 4:1. 1 mL of ammonia was

added drop wise. After vigorous agitation for 3 h, filtration, and rinsing with plenty of DI water, the paste was freeze-dried. The final products, NiFe LDH/CuO nanosheets (NiFe LDH/CuO NS) were ready for tests.

A control experiment, adding different amount of NiFe precursors, was carried out for morphology comparison. 96.75 mg of  $\text{Fe}(\text{NO}_3)_3 \cdot 6\text{H}_2\text{O}$  and 271.43 mg of  $\text{Ni}(\text{NO}_3)_3 \cdot 6\text{H}_2\text{O}$ , 64.50 mg of  $\text{Fe}(\text{NO}_3)_3 \cdot 6\text{H}_2\text{O}$  and 181.0 mg of  $\text{Ni}(\text{NO}_3)_3 \cdot 6\text{H}_2\text{O}$ , were added to prepare NiFe LDH-L/CuO NS and NiFe LDH-M/CuO NS.

#### (4) Synthesis of NiFe LDH/CuNWs

120 mg of CuNWs, different amounts of  $\text{Fe}(\text{NO}_3)_3 \cdot 6\text{H}_2\text{O}$  and  $\text{Ni}(\text{NO}_3)_3 \cdot 6\text{H}_2\text{O}$  were dispersed in 40 mL of DI water and stirred at 80 °C under  $\text{N}_2$ . The Ni:Fe atomic ratio was kept constantly at 4:1. 2 mL of ammonia was added drop wise. After vigorous agitation for 3 h, filtration, and rinsing with plenty of DI water, the paste was freeze-dried.

The dosages of  $\text{Fe}(\text{NO}_3)_3 \cdot 6\text{H}_2\text{O}$  and  $\text{Ni}(\text{NO}_3)_3 \cdot 6\text{H}_2\text{O}$  are listed in table below:

| Sample | $\text{Fe}(\text{NO}_3)_3 \cdot 6\text{H}_2\text{O}$<br>(mg) | $\text{Ni}(\text{NO}_3)_3 \cdot 6\text{H}_2\text{O}$<br>(mg) | Labelled as      |
|--------|--------------------------------------------------------------|--------------------------------------------------------------|------------------|
| 1      | 258.0                                                        | 723.7                                                        | NiFe LDH/CuNWs-L |
| 2      | 386.8                                                        | 1085.6                                                       | NiFe LDH/CuNWs   |
| 3      | 515.8                                                        | 1447.4                                                       | NiFe LDH/CuNWs-H |

### 3. Characterizations

The morphologies of as-prepared catalysts were observed by scanning electron

microscope (SEM) (TECNAI G2F20, FEI) equipped with Energy Dispersive X-Ray Spectroscopy (EDX). X-ray diffraction (XRD) was carried out on Ultima III (Rigaku) in the scanning  $2\theta$  range of 20-90° with Cu  $k\alpha$  ( $\lambda=0.15406$  nm) as radiation source. X-ray photoelectron spectroscopy (XPS) was performed on ESCALAB 250 (Thermo Scientific).

### 3.2 Electrochemical tests

The ink was prepared by ultrasonically dispersing 4 mg of sample f in a solution containing 1 mL of DI water, 1 mL of Isopropanol, and 20  $\mu\text{L}$  of 5% Nafion. OER was performed on CHI660 with a conventional three-electrode system. Glassy carbon ( $\phi = 5$  mm), platinum wire ( $\phi = 1$  mm), and Ag/AgCl were used as working electrode (WE), counter electrode, and reference electrode, respectively. Before used, WE was polished with  $\text{Al}_2\text{O}_3$  ( $\leq 50$  nm) slurry to a mirror-like surface and rinsed with plenty of DI water. Pipetted 10  $\mu\text{L}$  of ink onto the WE surface and dried under ambient condition, the WE was ready for electrochemical tests.

A

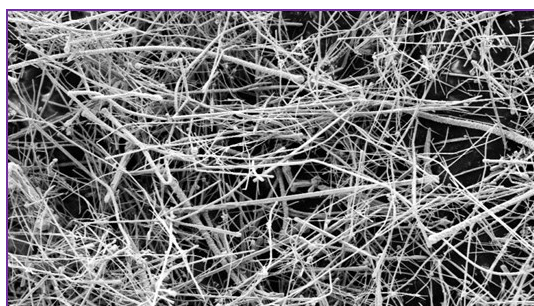

B

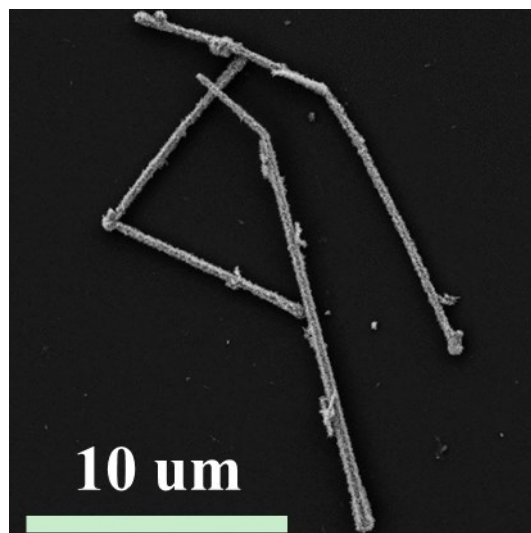

C

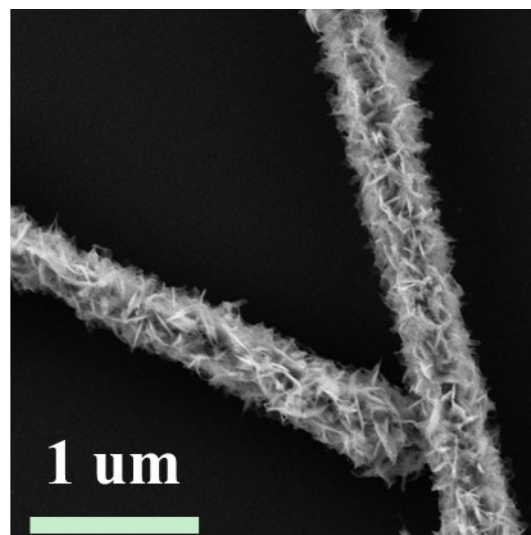

Figure S1 The SEM images of CuNWs (A), CuO NS/Cu NWs at low (B) and high (C) solutions.

A

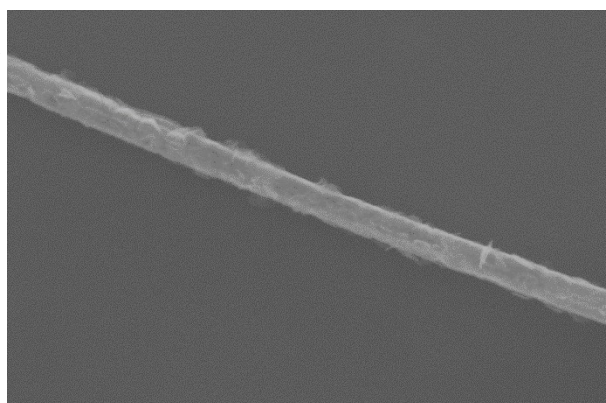

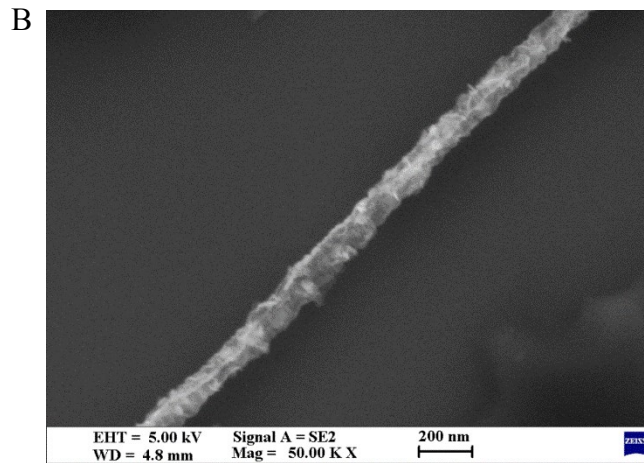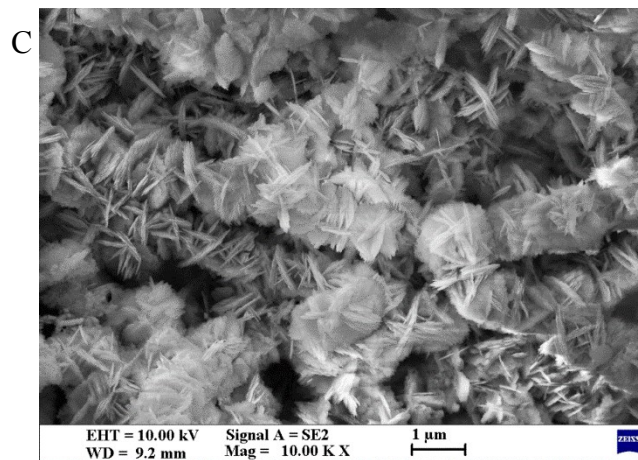

Figure S2 The SEM images of NiFe LDH/CuNWs with different density of NiFe LDHs.

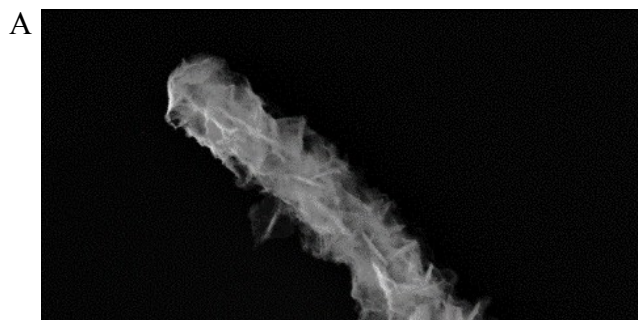

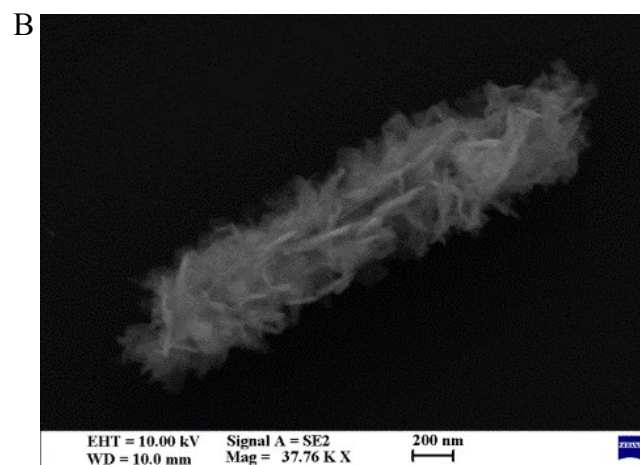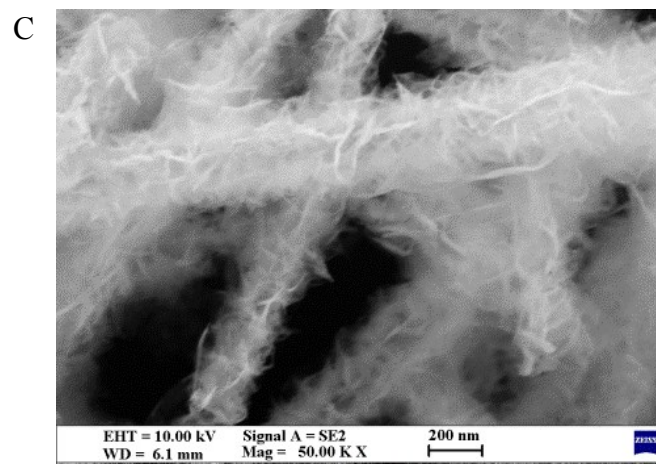

Figure S3 The SEM images of NiFe LDH-L/CuO NS and NiFe LDH-M/CuO NS.

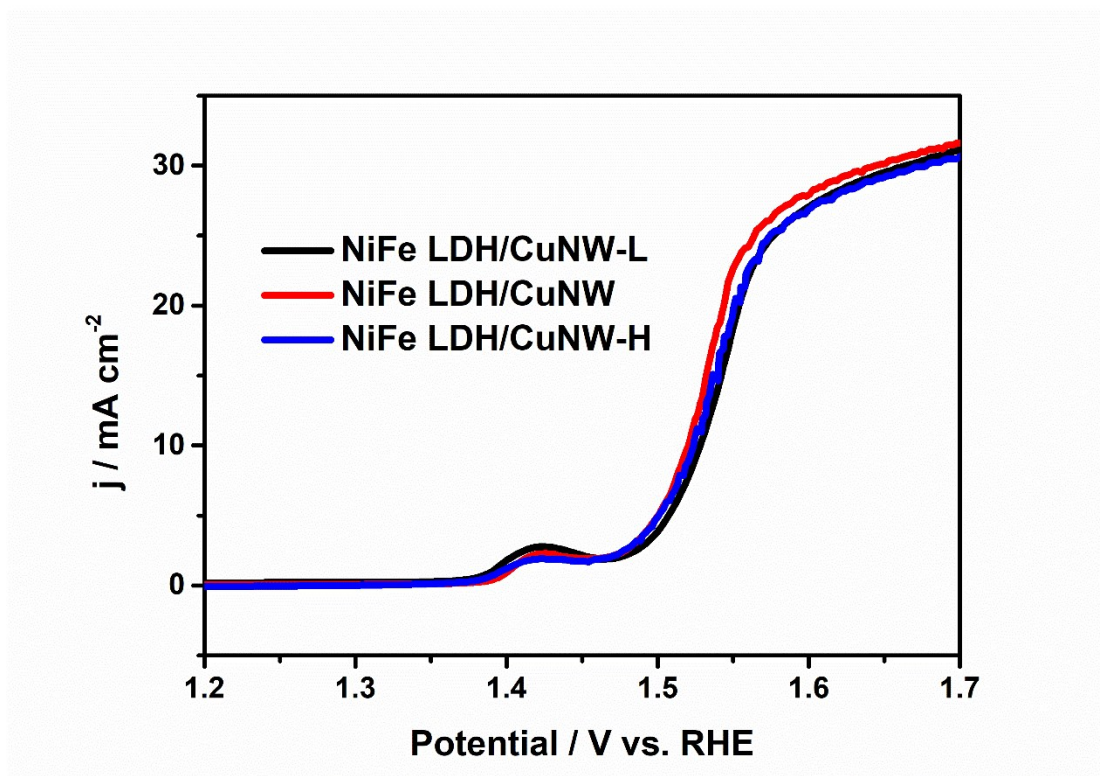

Figure S4 The LSV of NiFe LDH/CuNWs with different density of NiFe LDHs at the scanning rate of  $5 \text{ mV s}^{-1}$  in 1 M KOH.



Table S1 the elemental compositions of NiFe LDH/CuO NS detected by EDS.

| <b>Elements</b> | <b>wt%</b> |
|-----------------|------------|
| O               | 4.44       |
| Fe              | 4.11       |
| Ni              | 17.55      |
| Cu              | 73.91      |
| total           | 100.00     |

Table S2 The overpotentials and Tafel slopes of catalysts reported in literatures

| Catalyst                                   | Overpotential<br>(mV)                         | Tafel slope<br>(mV dec <sup>-1</sup> ) | Ref. |
|--------------------------------------------|-----------------------------------------------|----------------------------------------|------|
| NiFe LDH/AgNWs                             | 265 mV at 10 mA cm <sup>-2</sup><br>(1M KOH)  | 122                                    | 1    |
| NiFe LDH/CuO nanorods                      | 290 mV at 50 mA cm <sup>-2</sup><br>(1M KOH)  | 60                                     | 2    |
| NiFe LDH/NiCoP nanoarray                   | 220 mV at 10 mA cm <sup>-2</sup><br>(1M KOH)  | Not given                              | 3    |
| NiFe oxyfluoride holey film                | 295 mV at 10 mA cm <sup>-2</sup><br>(1M KOH)  | 38                                     | 4    |
| NiO/NiFe LDH                               | 205 mV at 30 mA cm <sup>-2</sup><br>(1M KOH)  | 30                                     | 5    |
| NiFeV LDHs                                 | 195 mV at 20 mA cm <sup>-2</sup><br>(1M KOH)  | 42                                     | 6    |
| NiCe@NiFe/NF-N                             | 254 mV at 100 mA cm <sup>-2</sup><br>(1M KOH) | 59.9                                   | 7    |
| Single atom Au/ NiFe LDH                   | 263 mV at 10 mA cm <sup>-2</sup><br>(1M KOH)  | Not given                              | 8    |
| Cu@NiFe LDH                                | 199 mV at 10 mA cm <sup>-2</sup><br>(1M KOH)  | 27.8                                   | 9    |
| V-Ni <sub>3</sub> S <sub>2</sub> @NiFe LDH | 209 mV at 10 mA cm <sup>-2</sup><br>(1M KOH)  | 32.5                                   | 10   |

## References:

1. B. Zhu, Q. Hu, X. Liu, G. Li, L. Fan, Q. Zhang, J. Liu and C. He, *Chemical communications*, 2018, **54**, 10187-10190.
2. Q. Zhou, T.-T. Li, J. Qian, W. Xu, Y. Hu and Y.-Q. Zheng, *ACS Applied Energy Materials*, 2018, **1**, 1364-1373.
3. H. Zhang, X. Li, A. Hähnel, V. Naumann, C. Lin, S. Azimi, S. L. Schweizer, A. W. Maijenburg and R. B. Wehrspohn, *Advanced Functional Materials*, 2018, **28**.
4. K. Liang, L. Guo, K. Marcus, S. Zhang, Z. Yang, D. E. Perea, L. Zhou, Y. Du and Y. Yang, *ACS Catalysis*, 2017, **7**, 8406-8412.
5. Z. W. Gao, J. Y. Liu, X. M. Chen, X. L. Zheng, J. Mao, H. Liu, T. Ma, L. Li, W. C. Wang and X. W. Du, *Advanced materials*, 2019, **31**, e1804769.
6. P. Li, X. Duan, Y. Kuang, Y. Li, G. Zhang, W. Liu and X. Sun, *Advanced Energy Materials*, 2018, **8**.
7. G. Liu, M. Wang, Y. Wu, N. Li, F. Zhao, Q. Zhao and J. Li, *Applied Catalysis B: Environmental*, 2020, **260**.
8. J. Zhang, J. Liu, L. Xi, Y. Yu, N. Chen, S. Sun, W. Wang, K. M. Lange and B. Zhang, *Journal of the American Chemical Society*, 2018, **140**, 3876-3879.
9. L. Yu, H. Zhou, J. Sun, F. Qin, F. Yu, J. Bao, Y. Yu, S. Chen and Z. Ren, *Energy & Environmental Science*, 2017, **10**, 1820-1827.
10. J. Zhou, L. Yu, Q. Zhu, C. Huang and Y. Yu, *Journal of Materials Chemistry A*, 2019, **7**, 18118-18125.
